# Supplementary material for: CoreNEURON : An Optimized Compute Engine for the NEURON Simulator
Source: PubMed Central journal article supplement (PMC6763692; doi:10.3389/fninf.2019.00063), 2019-09-19
Supplement: Table_1.pdf [file Table_1.pdf]

## Supplementary Material

### 0.1 Supplementary Tables

**Table S1.** Different semantics types introduced to facilitate memory *serialization* and *deserialization* are listed with their purpose. For example, *area* and *pntproc* are to identify compartment area (*double* value) and point process (*Point\_process* object) respectively.

| Semantic Name       | Purpose                                       |
|---------------------|-----------------------------------------------|
| area                | area of the compartment or segment            |
| iontype             | type of ion used (calcium, sodium, potassium) |
| cvodeieq            | element on event queue                        |
| netsend             | network send event for communication          |
| pointer/corepointer | pointer variable used in NEURON/CoreNEURON    |
| pntproc             | point process object                          |
| watch               | element used as WATCH statement               |
| diam                | diameter of the compartment or segment        |
